# Supplementary material for: Adult Tissue Extracellular Matrix Determines Tissue Specification of Human iPSC‐Derived Embryonic Stage Mesodermal Precursor Cells
Source: PubMed Central journal article supplement (PMC7055561; doi:10.1002/advs.201901198), 2020-01-21
Supplement: ADVS-7-1901198-s001.pdf [file ADVS-7-1901198-s001.pdf]

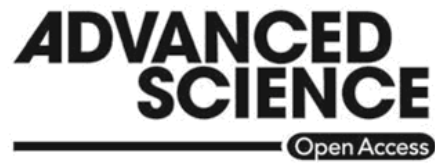

## Supporting Information

for *Adv. Sci.*, DOI: 10.1002/adv.201901198

Adult Tissue Extracellular Matrix Determines Tissue  
Specification of Human iPSC-Derived Embryonic Stage  
Mesodermal Precursor Cells

*Imran Ullah, Jonas Felix Busch, Anja Rabien, Bettina Ergün,  
Christof Stamm, Christoph Knosalla, Stefan Hippenstiel, Petra  
Reinke, and Andreas Kurtz\**

## SUPPLEMENTARY FIGURES AND TABLES

### Supplementary Video S1 (see in the supporting information)

Beating cardiomyocytes develop from P-meso cells at day 7 post seeding only on heart dECM.

Figure S1

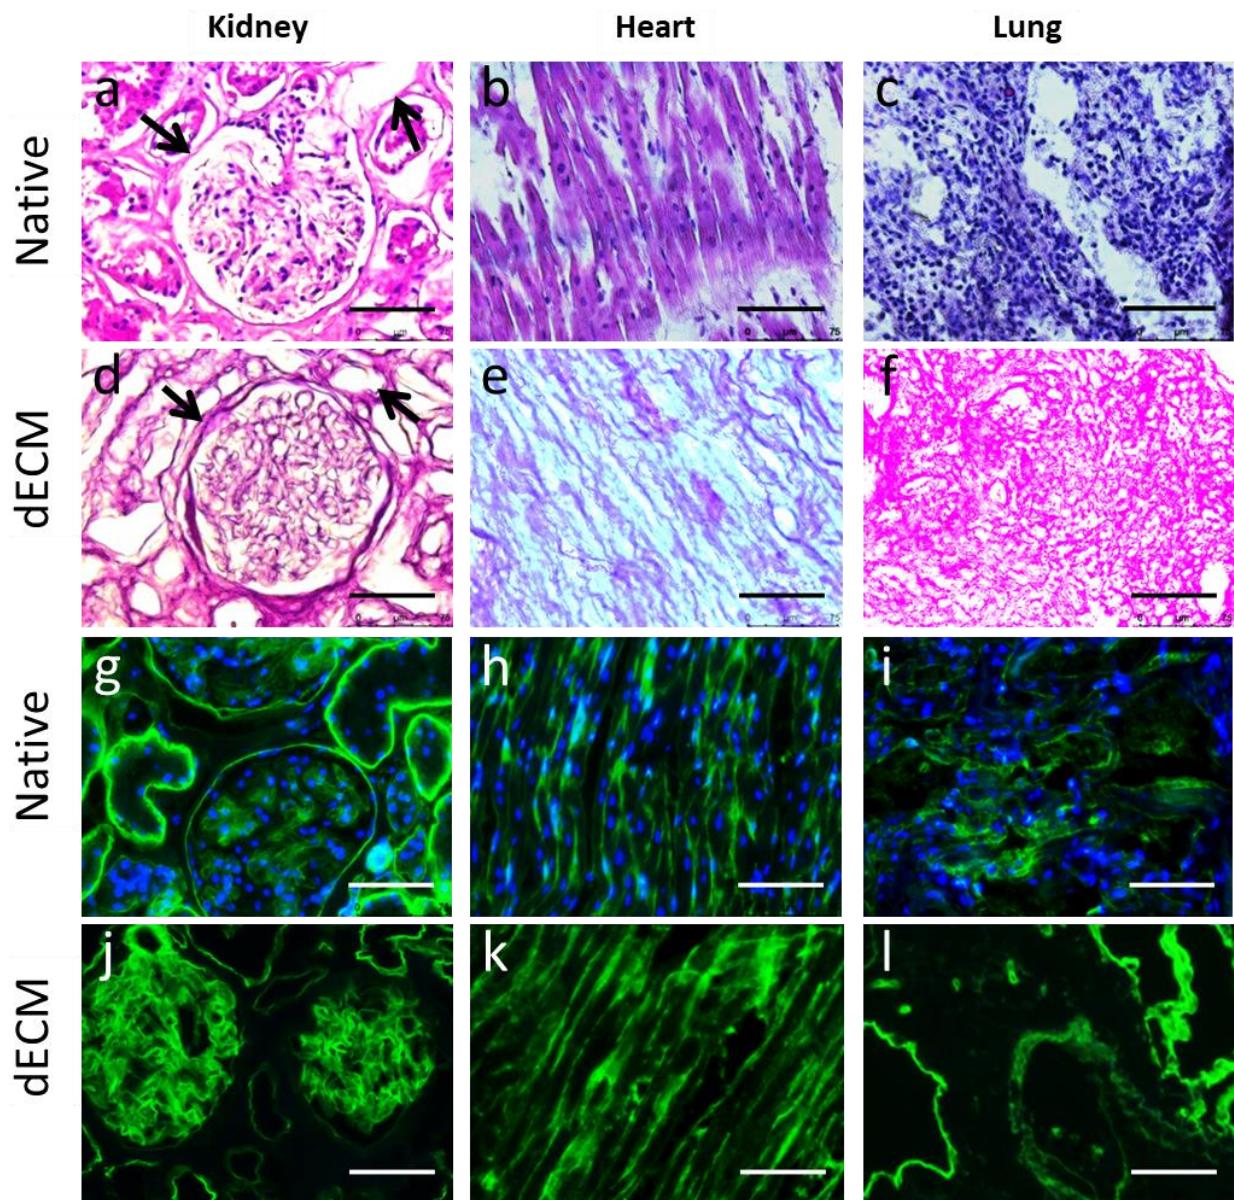

**Figure S1. Characterization of decellularized human kidney, heart and lung tissue slices.** (a-f) H&E staining of a section of human renal, cardiac and lung tissue of native (upper panel; a,b,c) and decellularized tissue (lower panel; d,e,f). (g-l) Laminin (green) and nuclei (blue) staining in native kidney, heart and lung tissues (g,h,i) and corresponding decellularized tissues (j,k,l). Scale bar: 75 $\mu$ m

**Figure S2**

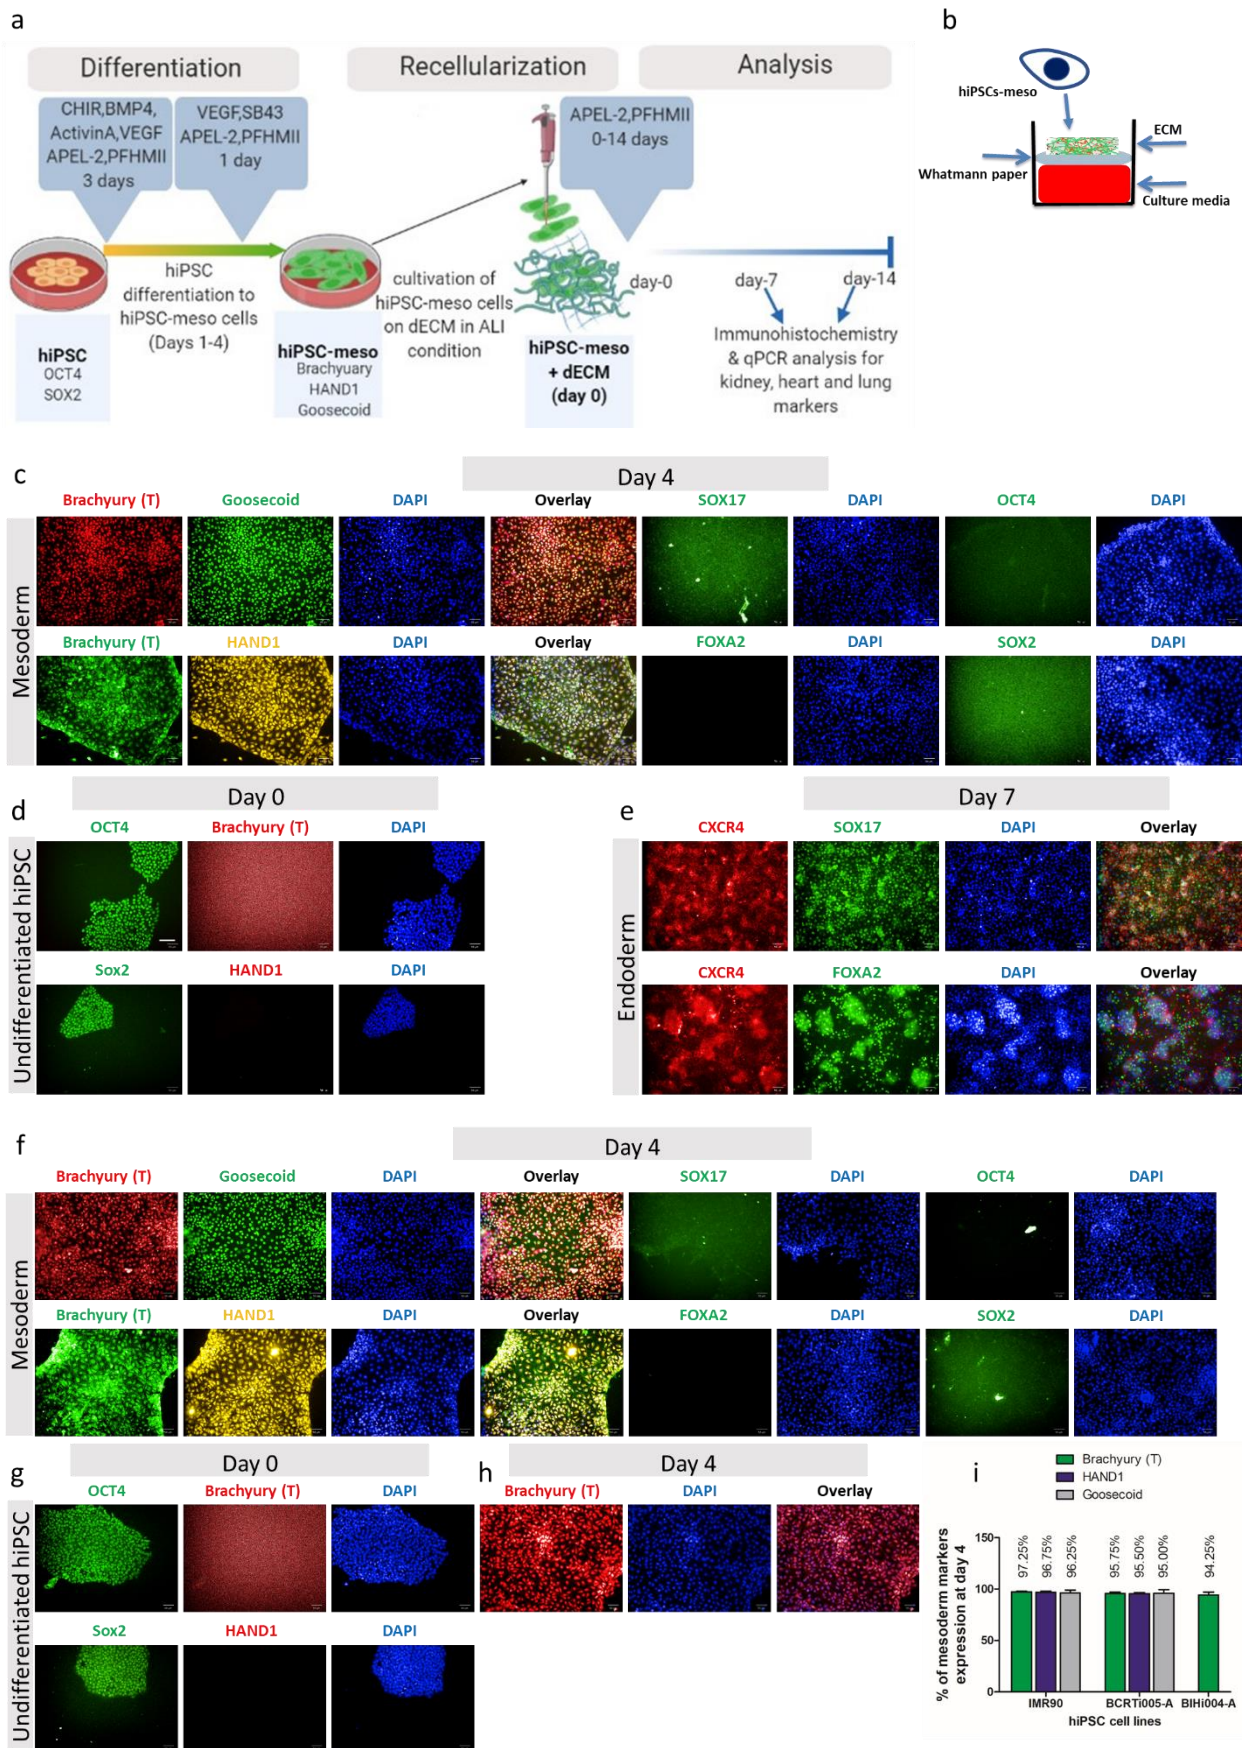

**Figure S2. Differentiation, re-cellularization scheme and characterization of human iPSC derived mesodermal cells (P-meso).** (a) Schematic presentation of time line and media composition used for mesodermal induction of hiPSC (Differentiation section) and seeding conditions and time points of analysis of P-meso cells on dECM preparations (Recellularization and analysis section). (b) Schematic depiction of air-liquid interphase cultivation model. The assays were performed with three hiPSC – lines (WISCi004-A, BCRTi005-A, BIHi004-A). (c-e) Data obtained with hiPSC-line WISCi004-A (IMR90): (c) Characterization of hiPSC-derived mesodermal cells (P-meso) at day 4 post differentiation induction. Cells express mesodermal markers Brachyury (T), HAND1 and goosecoid, but not endodermal markers FOXA2 and Sox17 nor pluripotency markers Oct4 and Sox2. (d,e) To show utility of the used detection methods, expression of pluripotency and mesodermal markers was analysed in undifferentiated hiPSC, and of endodermal markers in hiPSC-derived endodermal cells. (d) Oct4 and Sox2 are expressed in undifferentiated hiPSC. (e) Endodermal markers Sox17, FOXA2 and CXCR4 are expressed in hiPSC – derived endodermal cells at day 7 post endodermal induction. (f,g) Data from hiPSC - line BCRTi005-A: (f) hiPSC-derived mesodermal cells (P-meso) at day 4 post differentiation express mesodermal markers Brachyury (T), HAND1 and goosecoid, but not endodermal markers FOXA2 and Sox17 nor pluripotency markers Oct4 and Sox2. (g) Oct4 and Sox2 are expressed in undifferentiated hiPSC. (h) Data confirmed with hiPSC-line BIHi004-A with hiPSC-derived mesodermal cells (P-meso) at day 4 post differentiation express mesodermal markers Brachyury (T). (i) Quantitative analysis of mesoderm induction based on T, HAND1 and Goosecoid expression at day 4 post differentiation. Scale bar: 50µm. Mean ± SEM, n=6 (two for each cell line).

**Figure S3**

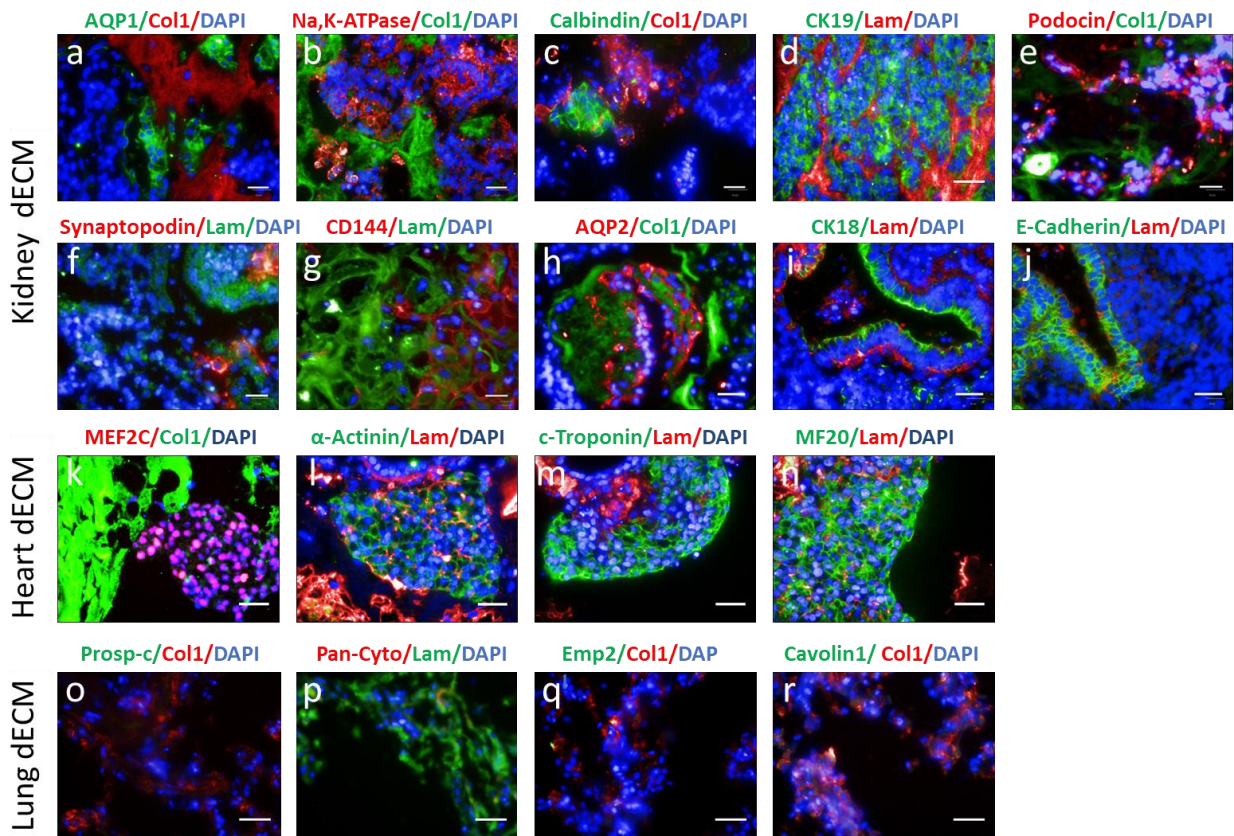

**Figure S3. Characterization of P-meso cells at day 7 post seeding on kidney, heart and lung dECM.** Kidney and heart cell markers were selected to identify different renal cell types (**a-j**) and immature and mature cardiac cells (**k-n**): (**a,b**) AQP1 and Na,K-ATPase for proximal tubules, (**c**) Calbindin for distal tubules (**d**) CK19 for loop of Henle, (**e,f**) podocin and synaptopodin for glomerulus, (**g**) CD144 for endothelial cells, (**h**) AQP2 for collecting duct, (**i,j**) CK18 and E-Cadherin for nephron epithelia. (**k-n**) MEF2C as cardiac progenitor marker, (**l-n**)  $\alpha$ -actinin, c-Troponin and MF20 as more mature cardiomyocyte markers. (**o-r**) none of the tested lung cell markers are expressed on lung dECM. Images are from different depths of the 800 $\mu$ m thick ECM showing uniform cellular penetration. Scale bars: 20 $\mu$ m

Figure S4

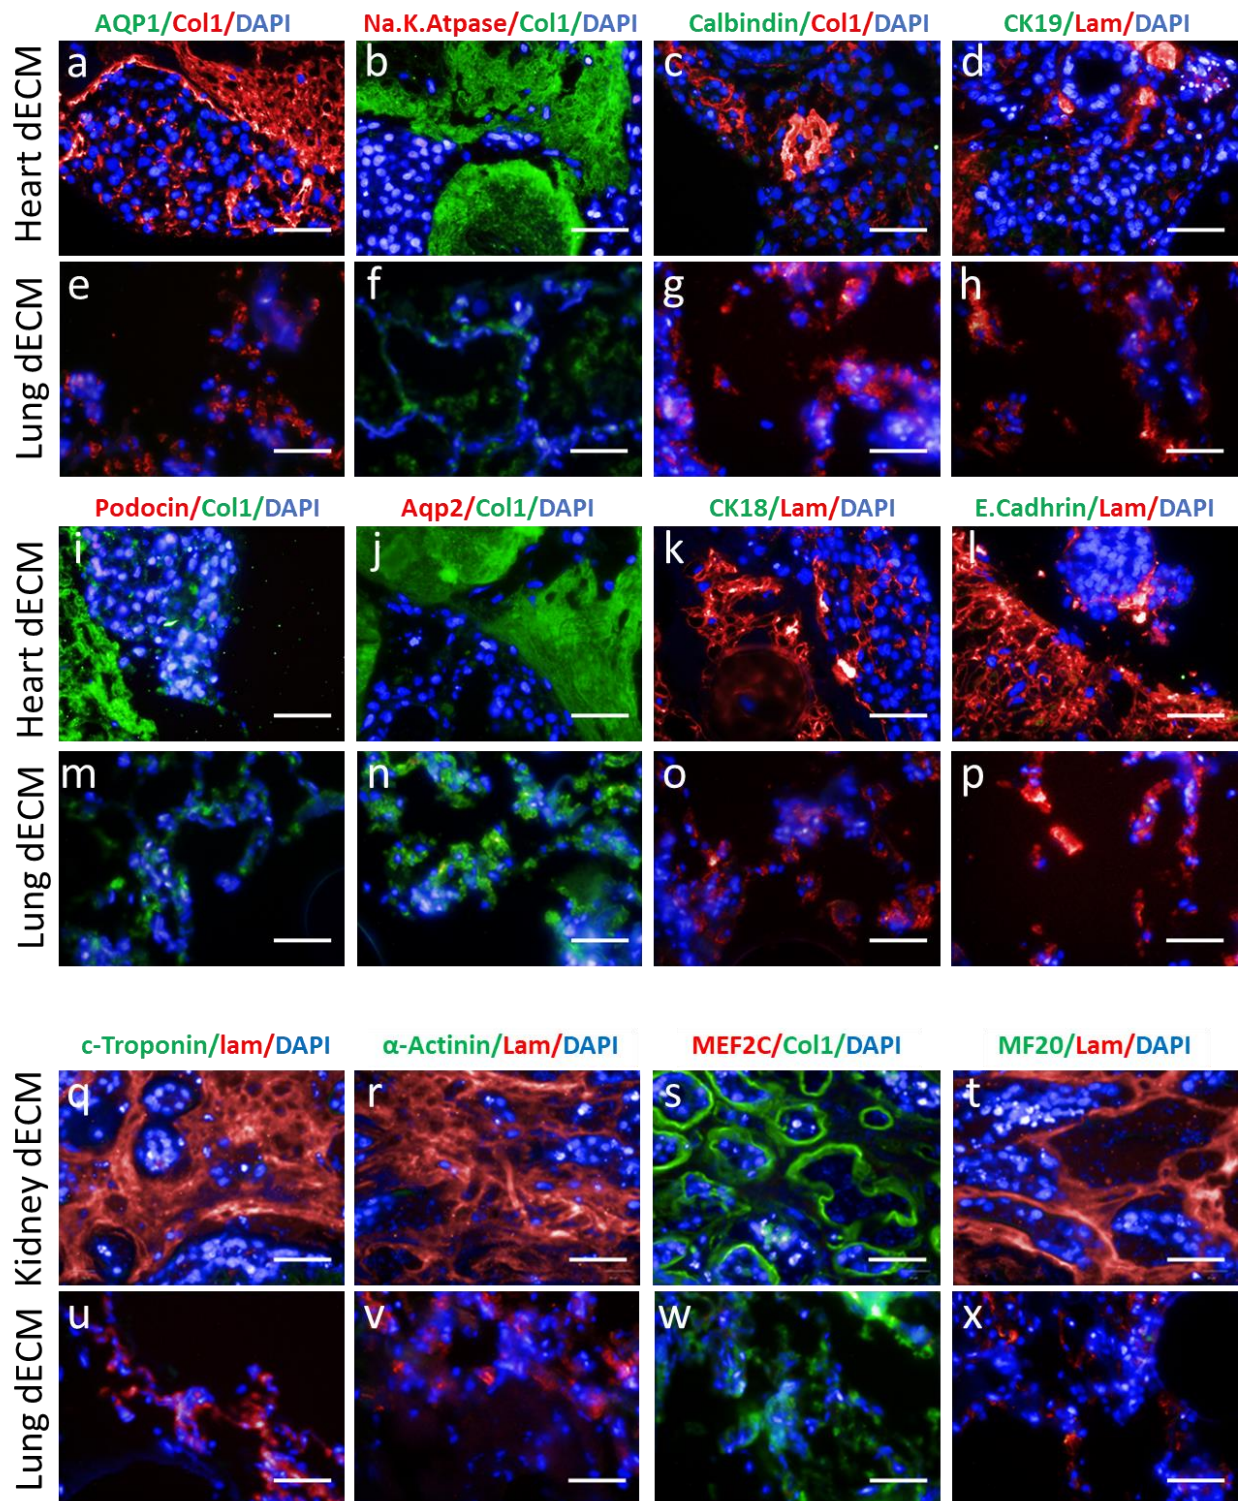

**Figure S4. Expression of tissue specific markers in P-meso cells is restricted to the source tissue of dECM and not detectable on ectopic dECM.** Human iPSC-meso cells were seeded on kidney, heart and lung ECM and expression of markers for kidney, heart and lung cell types

was assessed on the ectopic matrices. Expression of kidney markers by P-meso cells was not detectable on days 7 (not shown) or day 14 when seeded on heart dECM (**a-h**), or on lung dECM (**i-p**). Similarly, no expression of cardiac markers was detected in P-meso cells seeded on kidney dECM on day (**q-t**) or on lung dECM (**u-x**). Images are from different depths of the 800 $\mu$ m thick ECM showing uniform cellular penetration. Scale bar: 20 $\mu$ m

**Figure S5**

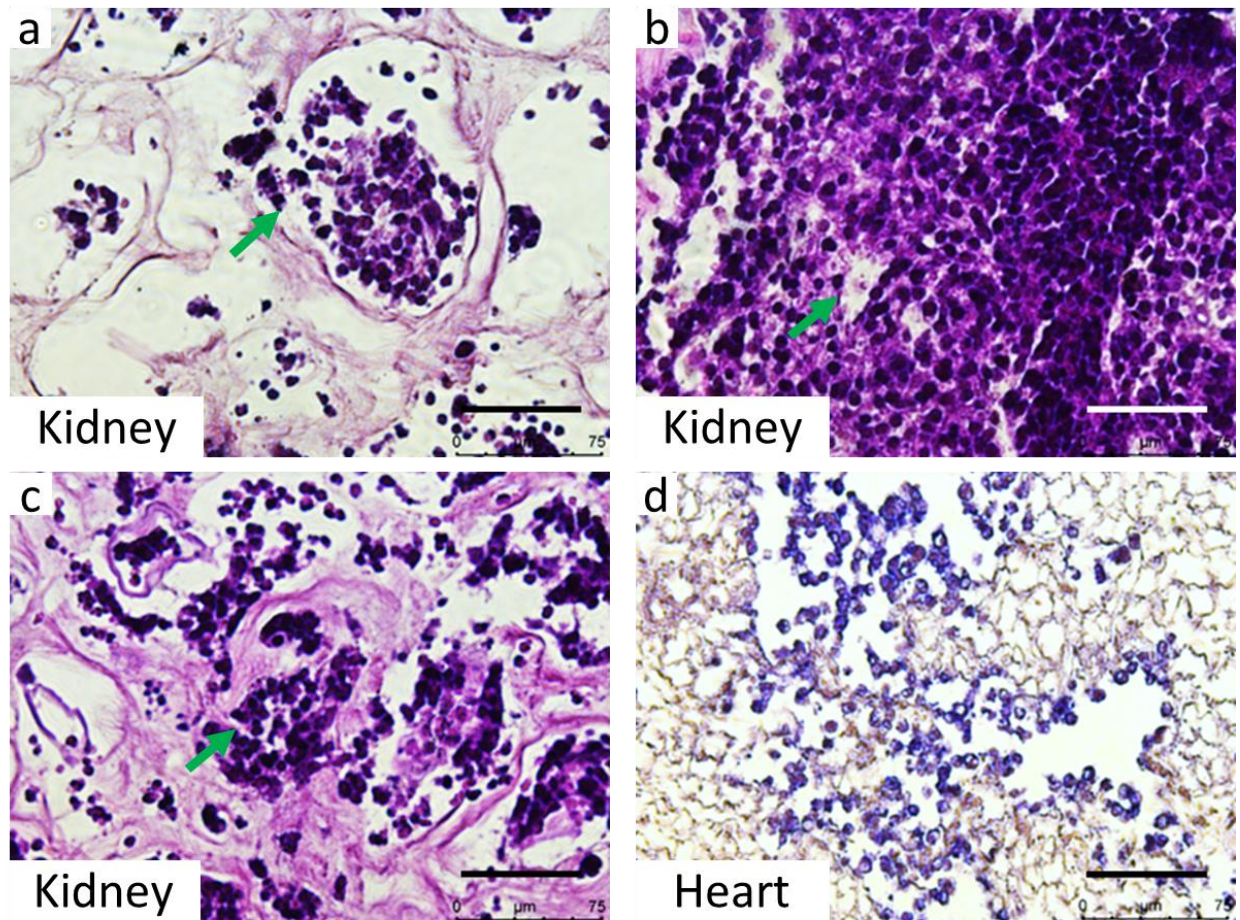

**Figure S5. Histological characterization of kidney, heart and lung dECM-HBGF repopulated with P-meso cells.** Representative hematoxylin and eosin (H&E) staining of kidney and heart dECM-HSPG sections at day 3, day 7 and day 14 post seeding with P-meso cells. **(a-c)** P-meso cells seeded on kidney and **(d)** on cardiac dECM-HSPG. **(a)** Cells form a cluster like aggregate on a glomerular structure (arrow). **(b)** Cells are generally disorganized and scattered on scaffold until day 14 **(c)** Cells close to the tubules/vessel - like structures (arrow) do not arrange as observed in non-heparitinase treated dECM (see figure 1). **(d)** On heart dECM-HSPG, the cells are distributed evenly, and the cells do not assemble into tightly packed clusters as observed in non-heparitinase treated dECM (see figure 1). Scale bar: 75 $\mu$ m



**Figure S6**

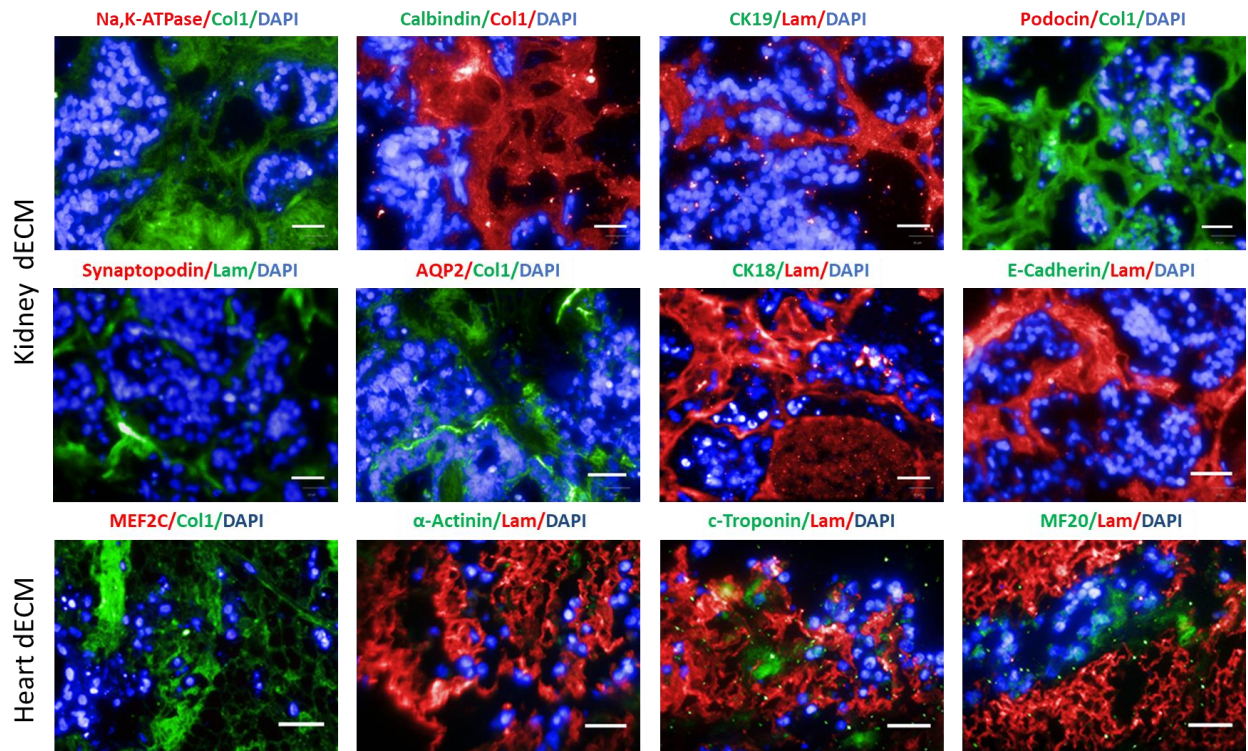

**Figure S6. Tissue specific differentiation of P-meso cells was not induced by dECM-HSPG.** None of the indicated renal or cardiac specific cell markers were detected by immunohistochemistry in P-meso cells seeded on kidney or heart dECM-HSPG.

**Supplementary Table 1:** List of antibodies used for Immunofluorescence

| <b>Name</b>     | <b>Species</b>    | <b>Description</b>  | <b>Company</b>           | <b>Cat.Nr</b> |
|-----------------|-------------------|---------------------|--------------------------|---------------|
| AQP 1           | Rabbitpolyclonal  | Proximal tubule     | Proteintech              | 20333-1-AP    |
| Na,K-ATPase     | Rabbitpolyclonal  | Proximal tubule     | Abcam                    | AB58475       |
| CK19            | Mouse monoclonal  | Loop of Henle       | Santa Cruz               | SC-6278       |
| Calbindin       | Rabbitpolyclonal  | Distal tubule       | Temecula California      | AB1778        |
| NPHS2           | Rabbitpolyclonal  | Podocyte            | Abcam                    | ab50339       |
| SYNPO           | Mouse monoclonal  | Podocyte            | Progen                   | 65294         |
| CD144           | Mouse monoclonal  | Endothelial cells   | BD Biosciences           | 555661        |
| Aqp2            | Rabbit polyclonal | Collecting duct     | Novus Biologicals        | NB110-74682   |
| CK18            | Mouse monoclonal  | Whole nephron       | Santa Cruz               | SC -6259      |
| E-Cadherin      | Mouse monoclonal  | Whole nephron       | BD Biosciences           | 610181        |
| Alpha actinin   | Mouse monoclonal  | Cardiac actinin     | Sigma                    | A7811         |
| MF-20           | Mouse monoclonal  | Myosin filament     | DSHB                     | AB_2147781    |
| RV-C2           | Mouse monoclonal  | Cardiac troponin    | DSHB                     | NS0           |
| MEF2C           | Rabbitpolyclonal  | Myocyte enhancer    | CellSignaling technology | 5030          |
| Anti proSP-C    | Rabbitpolyclonal  | Type II Pneumocyte  | Millipore                | AB3786        |
| Anti Caveolin1  | Rabbitpolyclonal  | Type I Pneumocyte   | Santa Cruz               | SC-894        |
| EMP2            | Rabbitpolyclonal  | Type I Pneumocyte   | Sigma                    | HPA014711     |
| pan-Cytokeratin | Mouse monoclonal  | Epithelial          | Santa Cruz               | sc-8018       |
| EG-VEGF         | Goatpolyclonal    | VEGF marker         | Santa Cruz               | SC-30343      |
| Laminin         | Rabbitpolyclonal  | ECM laminin         | Abcam                    | Ab11575       |
| Col1            | Mouse monoclonal  | ECM Collagen        | Abcam                    | ab6308        |
| OCT4            | Mouse conjugated  | Pluripotency        | BD Bioscience            | 560217        |
| SOX2            | Mouse conjugated  | Pluripotency        | BD Bioscience            | 560292        |
| Brachyury       | Rabbit Polyclonal | Definitive mesoderm | Santa Cruz               | SC-20109      |
| Brachyury       | Mouse monoclonal  | Definitive mesoderm | Santa Cruz               | SC-166962     |
| HAND1           | Rabbit polyclonal | Definitive mesoderm | Abcam                    | Ab196622      |
| Goosecoid       | Goat polyclonal   | Definitive mesoderm | R&D systems              | AF4086        |

|           |                  |                     |                 |             |
|-----------|------------------|---------------------|-----------------|-------------|
| CXCR4-APC | Mouse conjugated | Definitive endoderm | Miltenyi Biotec | 130-098-357 |
| FOXA2     | Goat conjugated  | Definitive endoderm | R&D systems     | IC2400G     |
| SOX17     | Mouse monoclonal | Definitive endoderm | R&D systems     | MAB1924     |

**Supplementary Table 2:** List of Primer used for qPCR

| <b>Target</b> | <b>Description</b> | <b>FORWARD PRIMER</b>     | <b>REVERSE PRIMER</b>   |
|---------------|--------------------|---------------------------|-------------------------|
| AQP1          | Proximal tubule    | AAGCTCTTCTGGAGGGCAG       | CACCTTCACGTTGTCCTGGACCG |
| NCCT          | Distal tubule      | CACCAAGAGGTTTGAGGACAT     | GACAGTGGCCTCATCCTTGA    |
| Na,K-AtPase   | Proximal tubule    | GCTGACCCGCCATCGCCA        | ACCAACTGCCACCGGTCTT     |
| NKCC2/SLC12A1 | Loop of Henle      | TTTGGAGCTGTTTTGTGCTG      | ATGGGTCCCCCTGTTAAGAC    |
| CK-7          | Collecting duct    | TCCGCGAGGTCACCATTAAC      | GCTCTGTCAACTCCGTCTCAT   |
| Podocin       | Podocyte           | CCTGCCTGGATACCTACCACA     | GCACAGCTTTAGATACATGAGCA |
| E-Cadherin    | Whole nephron      | GAGGACCAGGACTTTGACTT      | AGATACCGGGGGACACTCA     |
| CD144         | Endothelial cells  | AACTTCCCCTTCTTCACCC       | AAAGGCTGCTGGAAAATG      |
| MEF2C         | Cardiac progenitor | CGAAACTCACCAGGTCTGCT      | TAGCCAATGACTGAGCCGAC    |
| GATA4         | Cardiac progenitor | CAACTGCCAGACCACCACC       | CCCTCTTCCGCATTGCAAG     |
| Nkx2.5        | Cardiac progenitor | CCCGCCTTCTATCCACGTG       | GCCTCTGTCTTCTCCAGCTC    |
| b-MHC         | Cardiac mature     | GAAGCCCAGCACATCAAAAG      | GATCACCAACAACCCCTACG    |
| cTNI          | Cardiac mature     | TTTGACCTTCGAGGCAAGTTT     | CCCGGTTTTCTTCTCGGTG     |
| MLC-2V        | Cardiac mature     | TGAGAGACACCTTTGCTGCC      | CTCCCCAAACATTGTGAGGAAC  |
| GAPDH         | Control            | TTGCCATCAATGACCCCTTCA     | CGCCCCACTTGATTTTGGGA    |
| HPRT          | Control            | AGTCTGGCTTATATCCAACACTTCG | GACTTTGCTTTCTTGGTCAGG   |

**Supplementary Table 3: Age and sex of tissue donors**

| <b>Kidney</b> |            | <b>Heart</b> |            | <b>Lung</b> |            |
|---------------|------------|--------------|------------|-------------|------------|
| <b>Age</b>    | <b>Sex</b> | <b>Age</b>   | <b>Sex</b> | <b>Age</b>  | <b>Sex</b> |
| 74            | m          | 64           | m          | 39          | m          |
| 72            | m          | 64           | m          | 42          | m          |
| 56            | f          | 58           | m          | 71          | f          |
| 81            | m          | 52           | m          | 69          | m          |
| 61            | m          | 70           | f          |             |            |
| 55            | m          |              |            |             |            |
| 68            | m          |              |            |             |            |
| 63            | m          |              |            |             |            |
| 65            | m          |              |            |             |            |
| 54            | f          |              |            |             |            |
| 64            | m          |              |            |             |            |
| 66            | f          |              |            |             |            |
| 44            | m          |              |            |             |            |
| 84            | m          |              |            |             |            |
